# Supplementary material for: Noise reduction strategies in metagenomic chromosome confirmation capture to link antibiotic resistance genes to microbial hosts
Source: bioRxiv or medRxiv preprint supplement (doi:10.1101/2022.11.05.514866), 2022-11-05
Supplement: Supplementary file [file media-1.pdf]

**Supplementary Table 1. Read counts during meta3C/Hi-C analysis**

| Dataset                                       | G_3C        | M_3C        | Y_3C          |               | D_HiC       | P_HiC       | K_HiC*     |
|-----------------------------------------------|-------------|-------------|---------------|---------------|-------------|-------------|------------|
|                                               |             |             | Y_3C_A        | Y_3C_B        |             |             |            |
| <b>Processed reads</b>                        | 198,493,086 | 366,961,002 | 2,921,579,828 | 1,239,950,680 | 133,509,800 | 157,755,162 | 37,984,239 |
| <b>Reads mapped (MAPQ&gt;20)</b>              | 181,467,148 | 278,726,053 | 2,868,601,794 | 1,155,939,113 | 108,556,752 | 124,877,330 | 32,412,518 |
| <b>Percentage mapped</b>                      | 91.42%      | 75.96%      | 98.19%        | 93.22%        | 81.31%      | 79.16%      | 85.66%     |
| <b>Intercontig reads</b>                      | 3,271,007   | 35,717,451  | 188,322,547   | 94,104,831    | 9,488,683   | 21,679,019  | 192,510    |
| <b>Percentage intercontig</b>                 | 1.65%       | 9.73%       | 6.45%         | 7.59%         | 7.11%       | 13.74%      | 0.64%      |
| <b>Filtered intercontig reads</b>             | 1,574,468   | 28,773,234  | 90,197,910    | 63,855,164    | 6,880,255   | 18,917,493  | 53,157     |
| <b>Percentage intercontig after filtering</b> | 0.79%       | 7.84%       | 3.09%         | 5.15%         | 5.15%       | 11.99%      | 0.18%      |

\*for K\_HiC, an average of 43 samples is presented in this table; For datasets that used multiple restriction enzymes, numbers presented are a combined total; MAPQ = mapping quality
