# Supplementary material for: Noise reduction strategies in metagenomic chromosome confirmation capture to link antibiotic resistance genes to microbial hosts
Source: bioRxiv or medRxiv preprint supplement (doi:10.1101/2022.11.05.514866), 2022-11-05
Supplement: Supplementary file [file media-2.pdf]

**Supplementary Table 2. Comparison of spike-in WGS and G\_3C reads that map to spike-in genomes**

| Spike-in                                          | <i>E. coli</i> E3090 |           | <i>E. faecium</i> E745 |           |
|---------------------------------------------------|----------------------|-----------|------------------------|-----------|
|                                                   | G_3C                 | WGS       | G_3C                   | WGS       |
| <b>Total reads</b>                                | 14,497,782           | 1,284,538 | 8,170,430              | 3,333,334 |
| <b>Reads mapped to G_3C assembly (MAPQ&gt;20)</b> | 14,237,338           | 1,256,272 | 7,764,542              | 3,175,581 |
| <b>%mapped to G_3C assembly</b>                   | 98.20%               | 97.80%    | 95.03%                 | 95.27%    |
| <b>Intercontig reads</b>                          | 141,473              | 10,080    | 81,191                 | 78,106    |
| <b>%intercontig reads</b>                         | 0.98%                | 0.78%     | 0.99%                  | 2.34%     |

WGS = whole genome sequencing; MAPQ = mapping quality; nt = nucleotides
